# Supplementary material for: Evaluating domestication and ploidy effects on the assembly of the wheat bacterial microbiome
Source: PubMed Central journal article supplement (PMC7971525; doi:10.1371/journal.pone.0248030), 2021-03-18
Supplement: pone.0248030.s001.pdf [file pone.0248030.s001.pdf]

# **Evaluating Domestication and Ploidy Effects on the Assembly of the Wheat Bacterial Microbiome**

Heidi M.-L. Wipf<sup>a</sup> and Devin Coleman-Derr<sup>a,b\*</sup>

<sup>a</sup>Department of Plant and Microbial Biology, University of California, Berkeley, CA, USA

<sup>b</sup>Plant Gene Expression Center, USDA-ARS, Albany, CA, USA

Corresponding author:

Devin Coleman-Derr

800 Buchanan Street, Albany, CA, 94710, United States of America

Email address: [colemanderr@berkeley.edu](mailto:colemanderr@berkeley.edu)

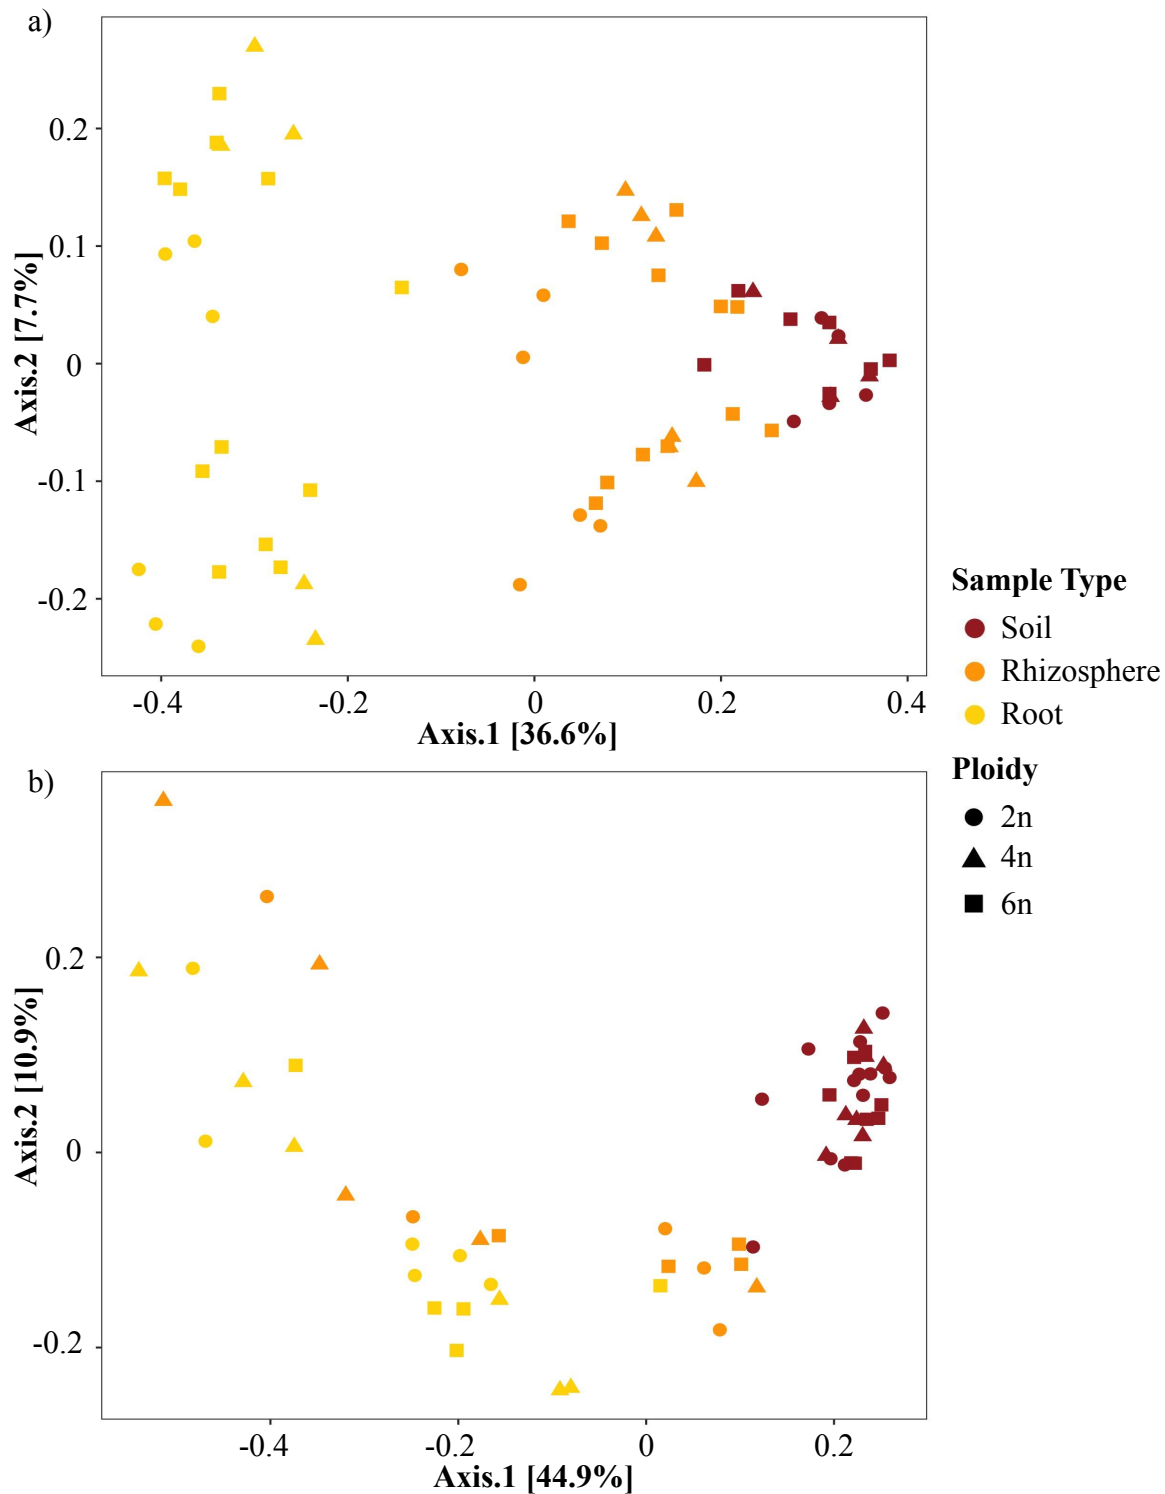

**S1 Fig . Samples cluster predominately by sample type.**

Principal coordinates analyses using Bray-Curtis dissimilarity for wheat bacterial communities from the 2015 field study (a), and greenhouse study (b). Sample type is distinguished by color (brown for soil, orange for rhizosphere, yellow for root) and ploidy level by shape (circles denoting 2n, triangles denoting 4n, and squares denoting 6n).

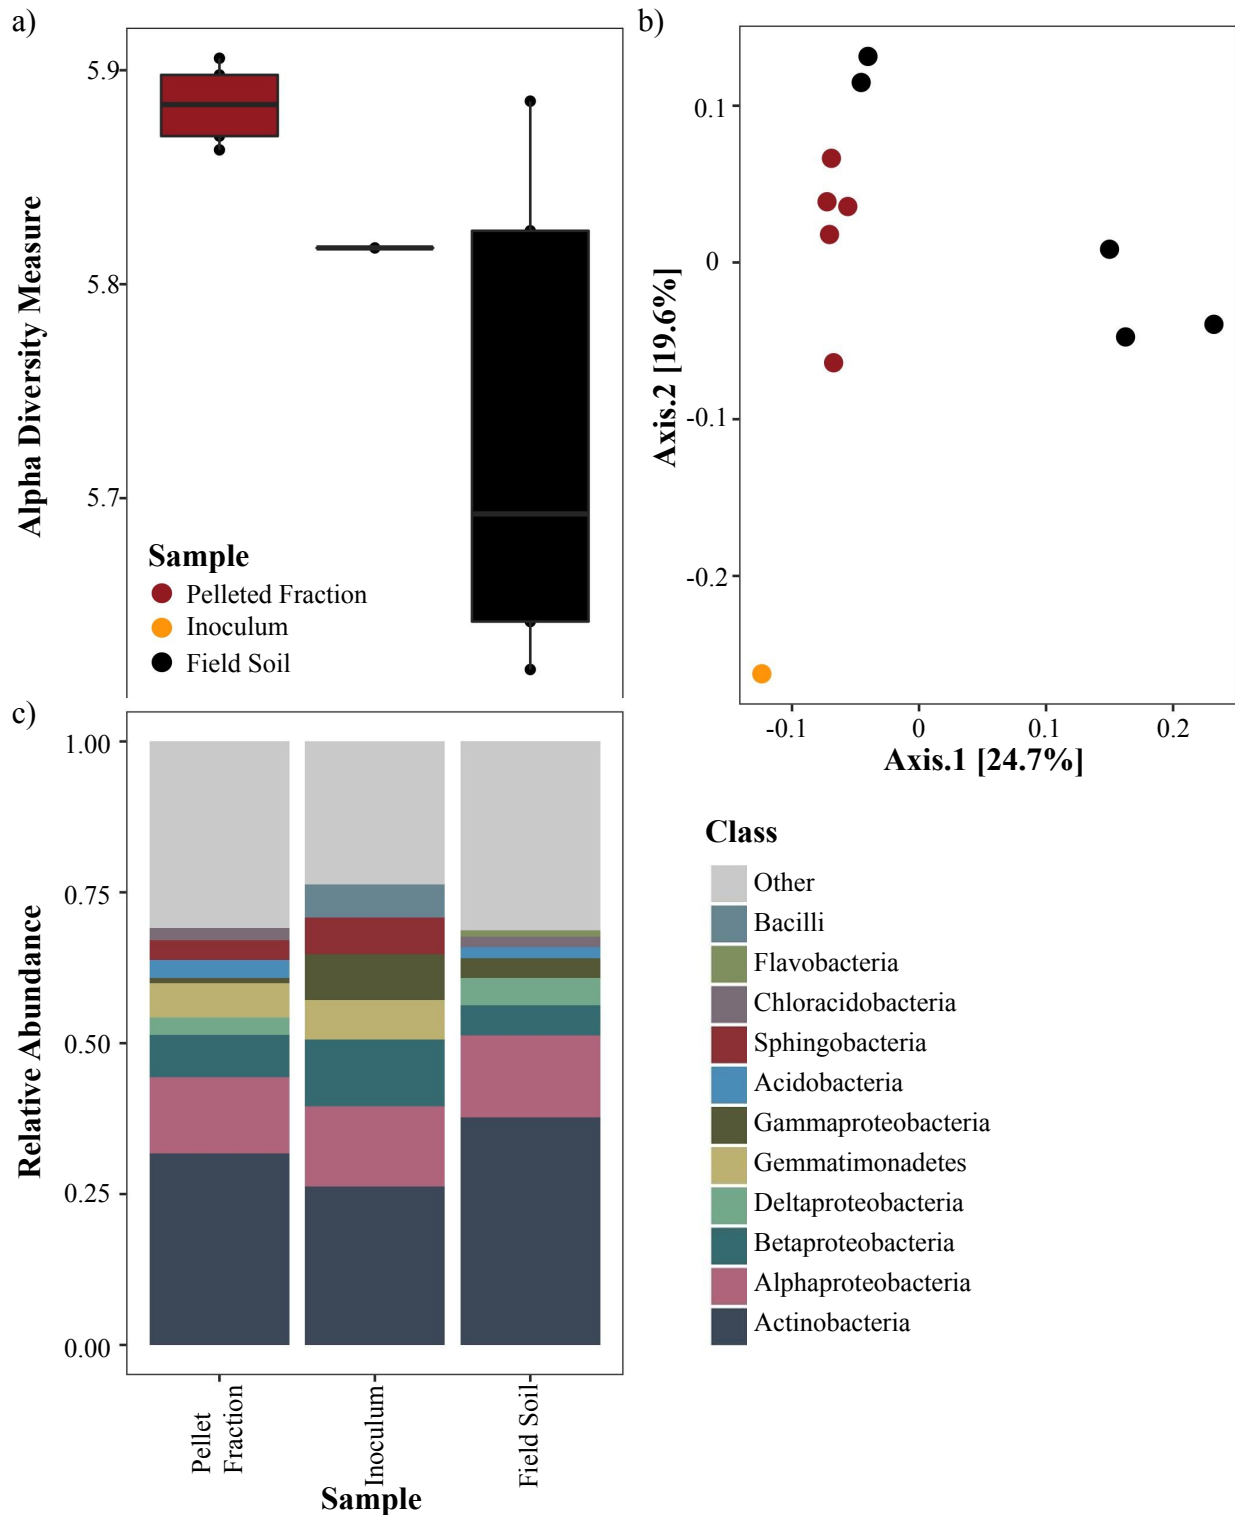

**S2 Fig . Characterization of the soil inoculum's bacterial community.**

Analysis of inoculum used in the greenhouse study, with boxplots of Shannon's Diversity (a), principle coordinate analysis using Bray-Curtis dissimilarity (b), and class-level relative abundances (c) of the bacterial community comprising the soil inoculum used, source field soil, and the centrifuged fraction separated from the inoculum.

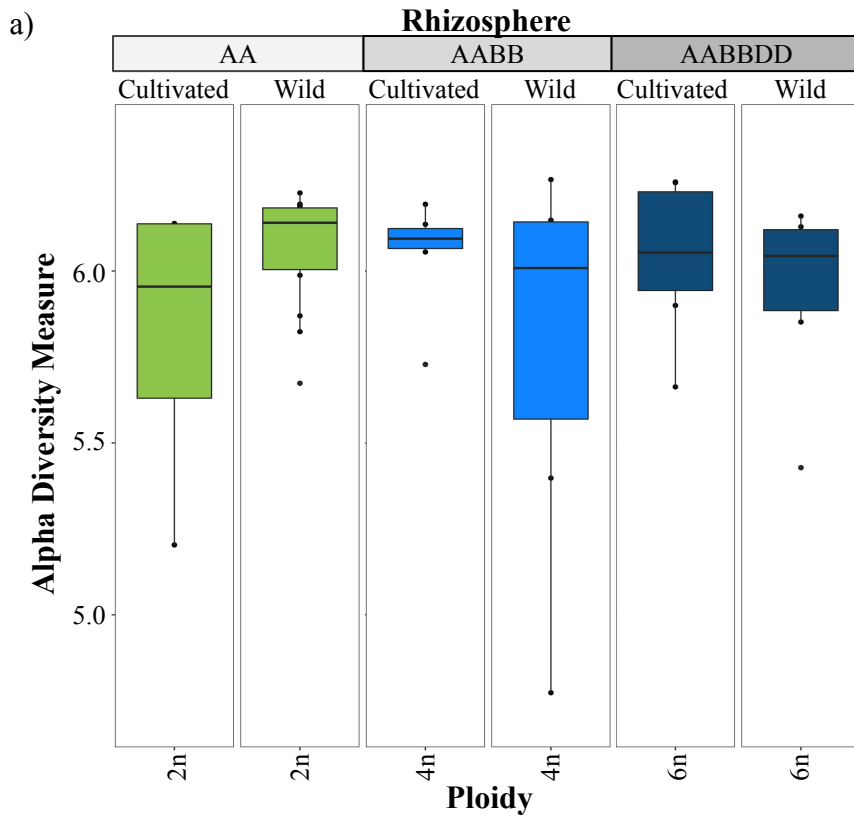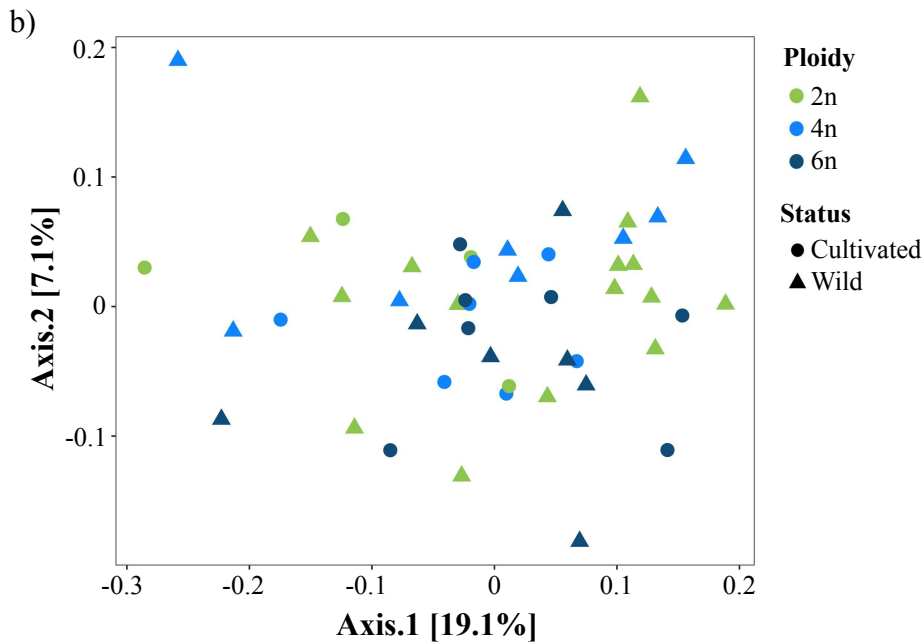

**S3 Fig. Polyploidy and domestication status do not correspond to distinct shifts in bacterial diversity in the 2017 field study.**

Alpha and beta diversity analyses of wheat rhizosphere bacterial communities, presented as a) boxplots of Shannon's Diversity and b) principal coordinates analysis plots using Bray-Curtis dissimilarity with ploidy indicated by color (light green, 2n; blue, 4n; dark blue 6n) and domestication status (circle, cultivated genotype; triangle, wild genotype). Genome lineage is denoted by 'AA', 'AABB', and 'AABBDD.'

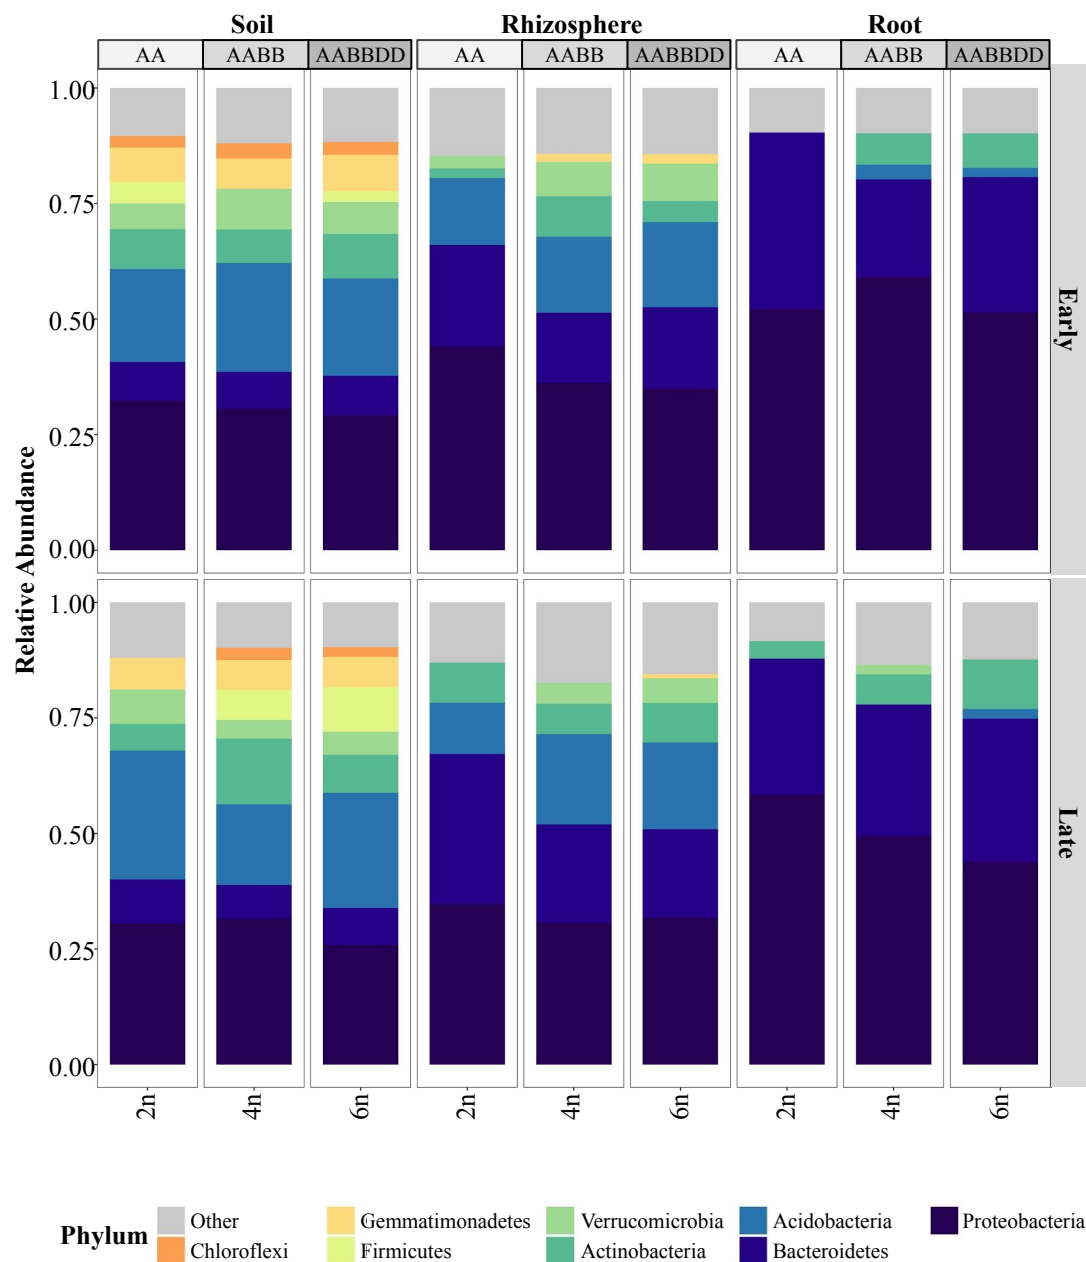

**S4 Fig. Ploidy level corresponds to distinct bacterial community compositional shifts.** Stacked bar graphs of phylum-level relative abundances of wheat bacterial community data from the 2015 field study, as faceted by sample type (soil, rhizosphere, and root) and time point (early and late). Genome lineage is denoted by ‘AA’, ‘AABB’, and ‘AABBDD’.

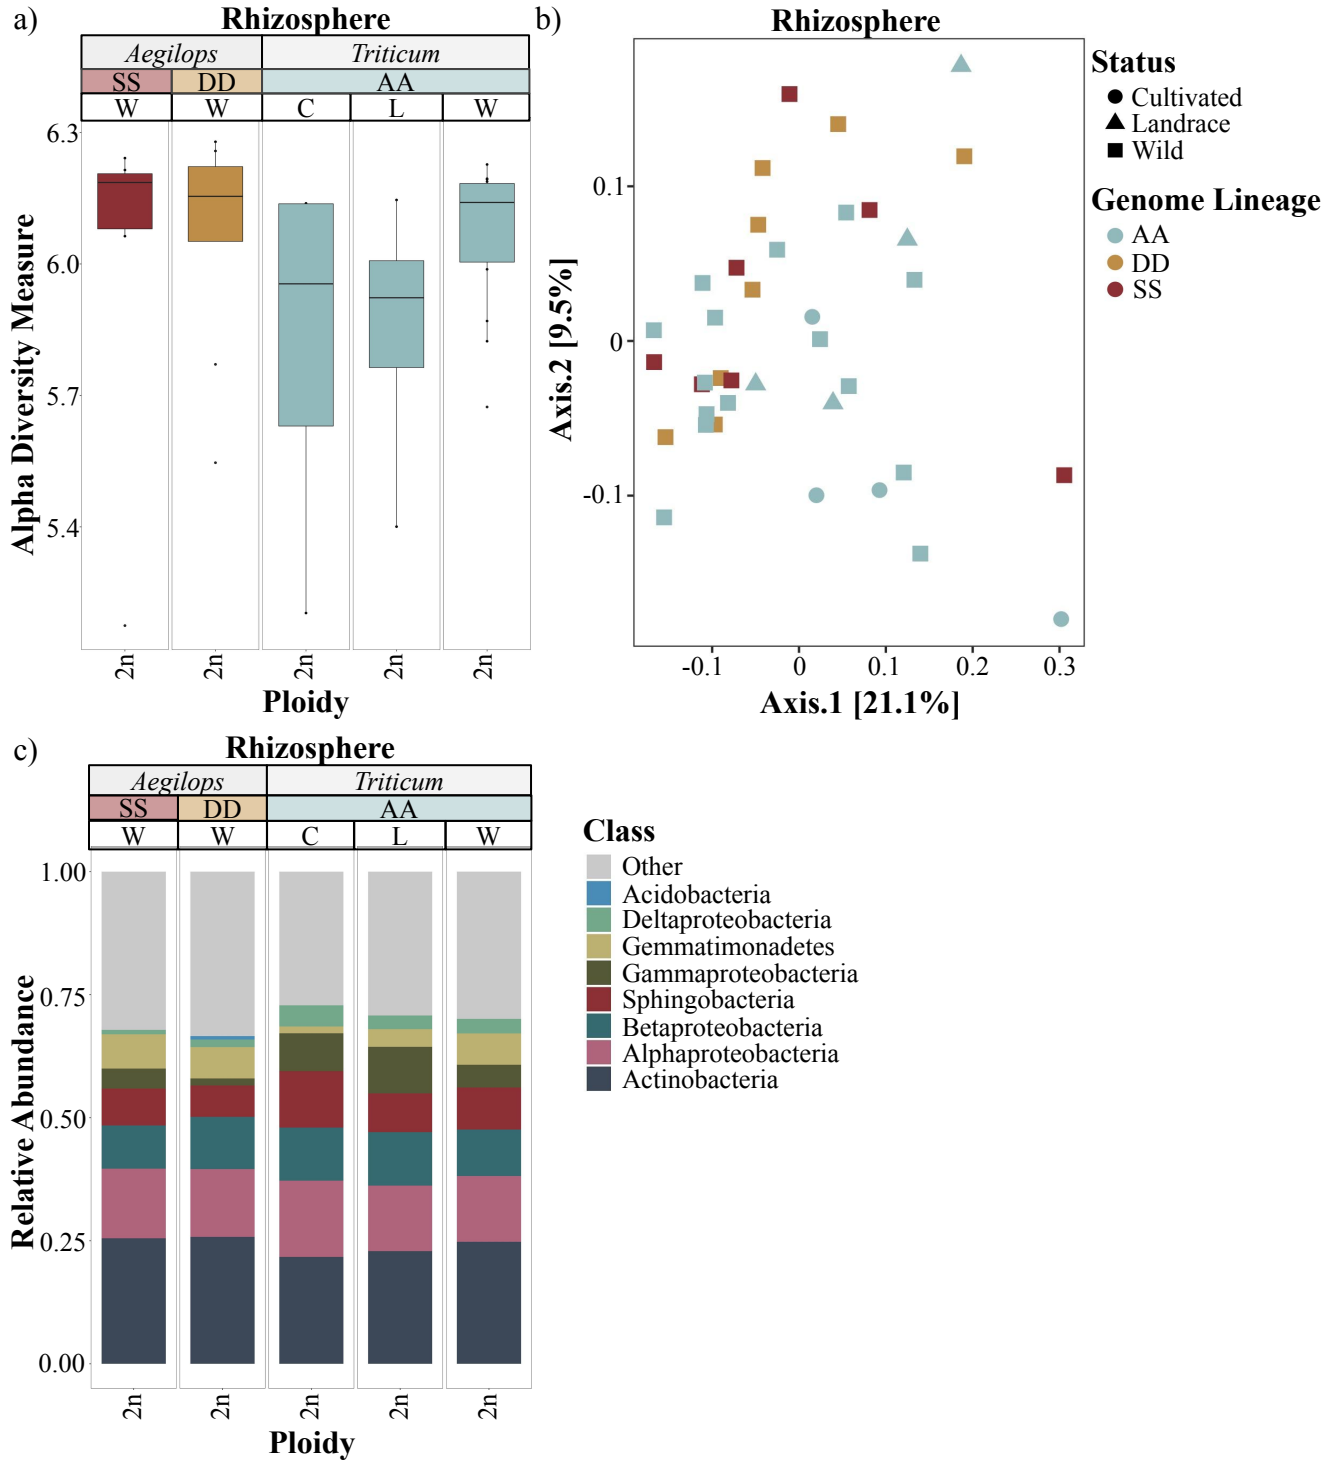

**S5 Fig.** Diversity and composition analysis of diploid genome lineages from wheat rhizosphere bacterial communities sampled in the 2017 field study, with boxplots of Shannon diversity (a), principal coordinates analysis plot using Bray-Curtis dissimilarity (b), and stacked bar graphs of class-level relative abundances (c), across ploidy level and parsed by genome lineage ('SS' - red, 'DD' - orange, and 'AA' - light blue) and domestication status ('C' for cultivated, 'W' for wild, and 'L' for landrace genotypes).

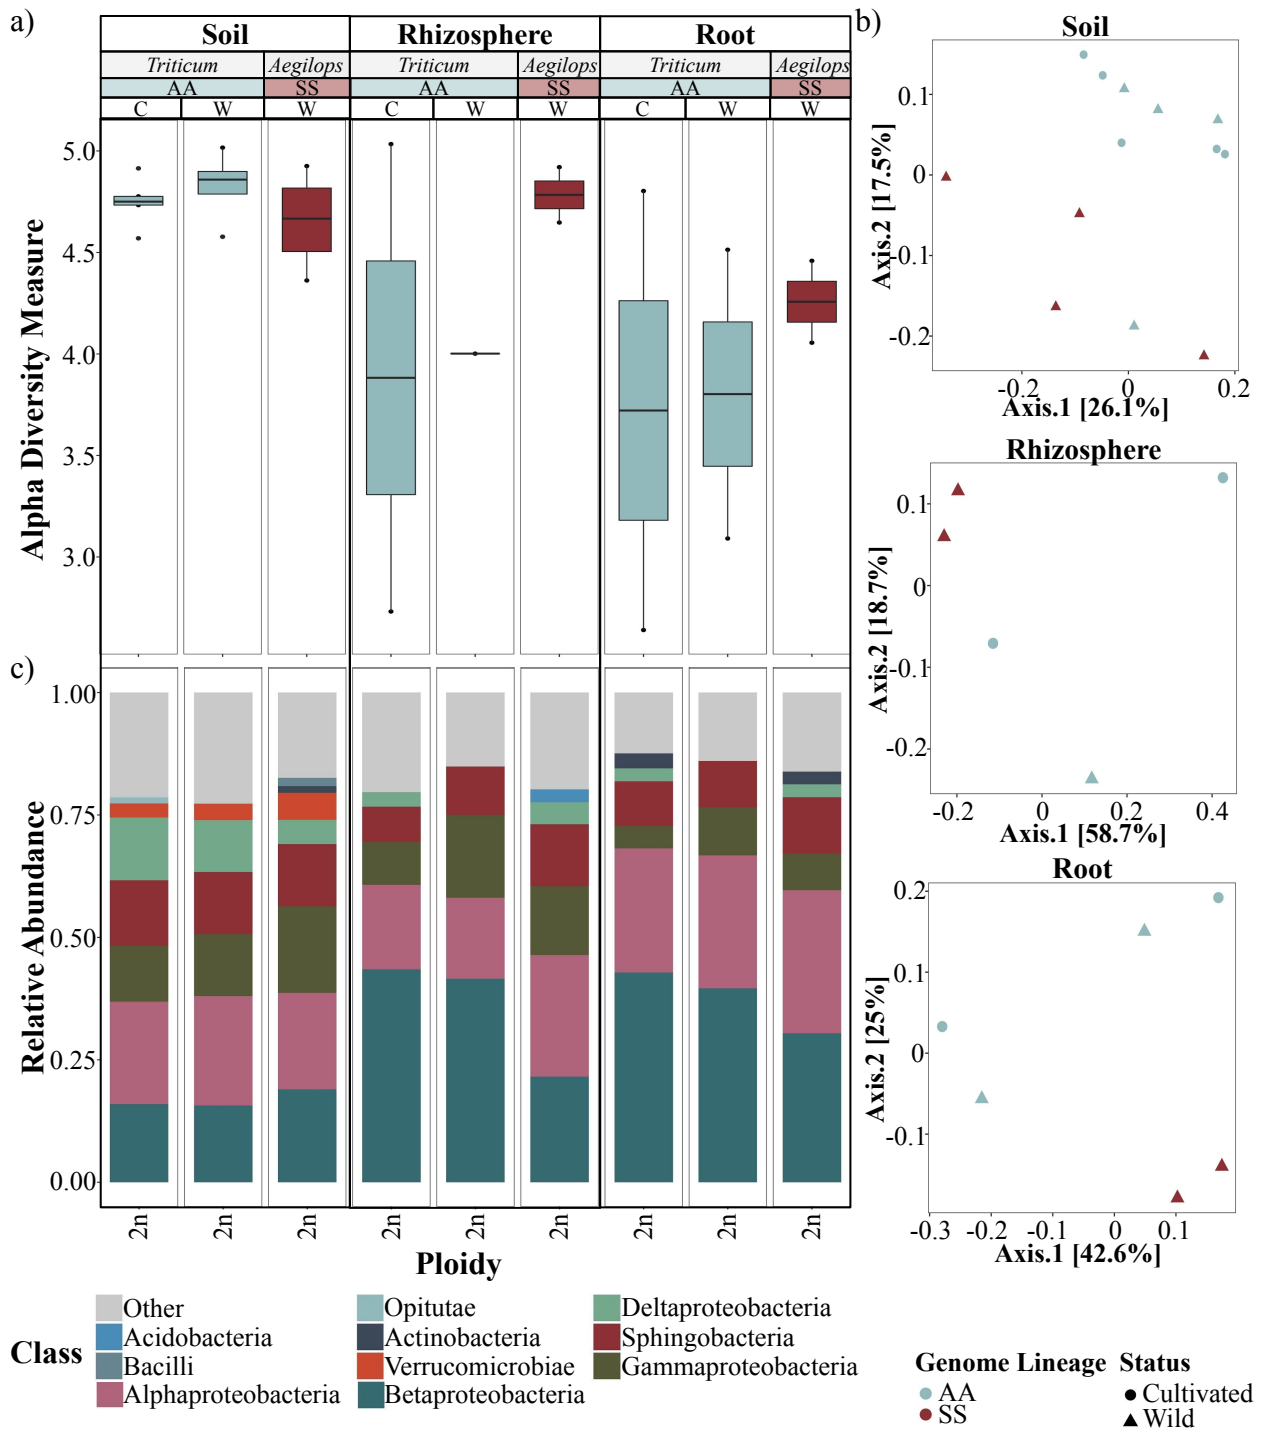

**S6 Fig. Wheat bacterial communities show slight variation across genome lineage and domestication status.** Diversity and composition analysis of diploid genome lineages from root and rhizosphere bacterial data from the greenhouse study, with boxplots of Shannon diversity (a), principal coordinates analysis plot using Bray-Curtis dissimilarity (b), and stacked bar graphs of class-level relative abundances (c), across ploidy level and parsed by genome lineage ('SS'- red and 'AA'- light blue), domestication status ('C' and circles for cultivated; 'W' and triangles for wild genotypes).

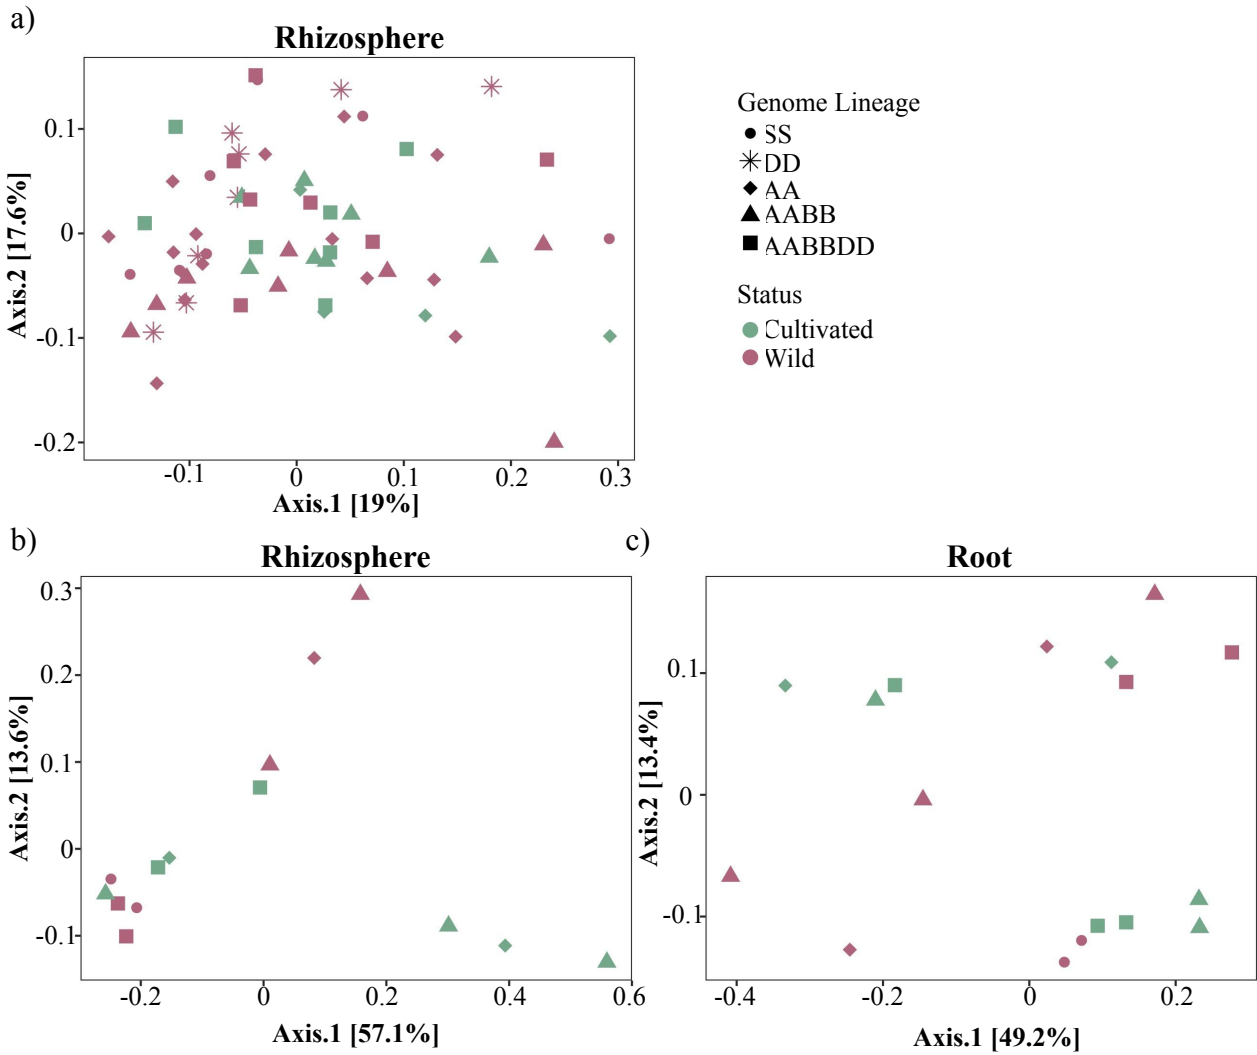

**S7 Fig. Domestication status does not distinctly structure wheat bacterial communities.**

Principal coordinates analysis of samples using Bray-Curtis dissimilarity for rhizosphere bacterial microbiome data from the 2017 field study (a), and rhizosphere (b) and root (c) bacterial microbiome data from our greenhouse study, as demarcated by genome lineage ('SS' is denoted by a circle, 'DD' by an asterisk, 'AA' a diamond, 'AABB' a triangle, and 'AABBDD' a square) and domestication status (green for cultivated genotypes, pink for wild).



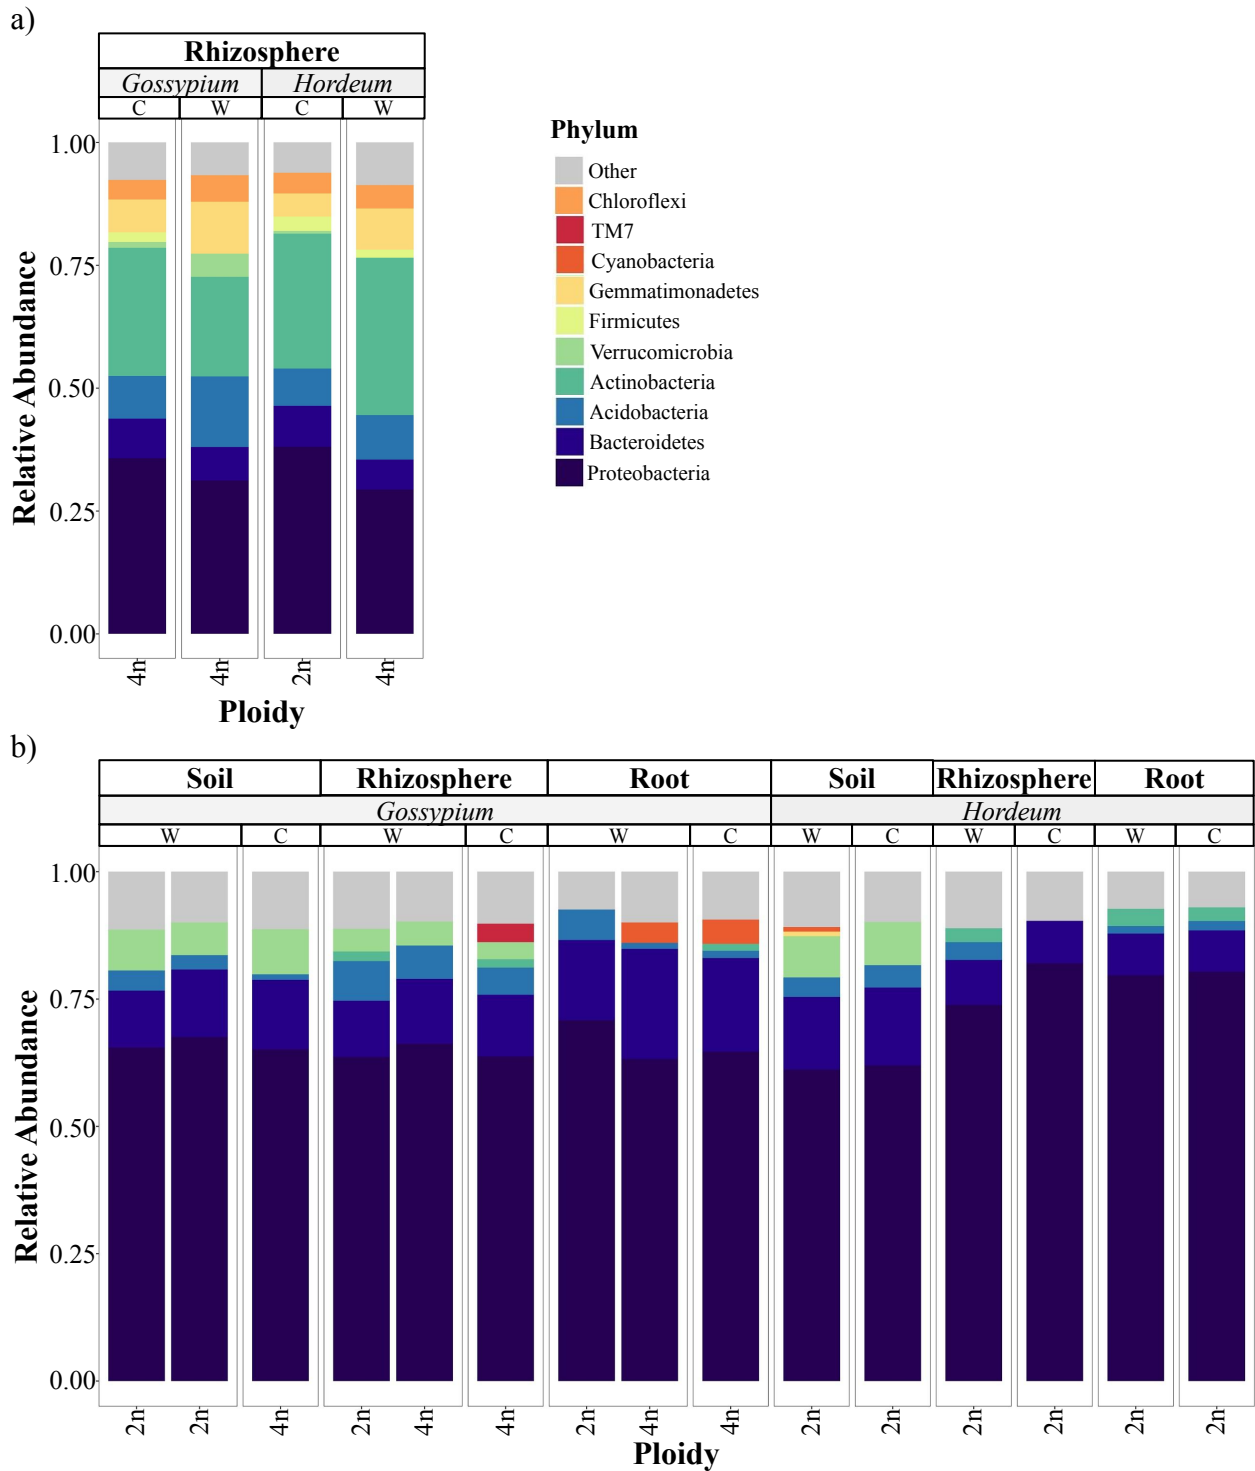

**S8 Fig. Outgroup species show distinct shifts across ploidy and domestication status.** Stacked bar graphs of phylum-level relative abundances across outgroups cotton (*Gossypium* sp.) and barley (*Hordeum vulgare*), from the 2017 field study (a) and the greenhouse study (b), as faceted by sample type (soil, rhizosphere, and root) and domestication status ('W' for wild, 'C' for cultivated genotypes).

**S1 Table.**

Genetic and source information on lines used for the greenhouse experiment. ‘CIMMYT’ denotes the International Maize and Wheat Improvement Center. ‘SID’ denotes species ID.

| <b>Ploidy</b> | <b>SID</b> | <b>Taxonomy</b>                                                     | <b>Origin</b>              | <b>Status</b> | <b>Genome Lineage</b> |
|---------------|------------|---------------------------------------------------------------------|----------------------------|---------------|-----------------------|
| 2n            | A04        | <i>Aegilops searsii</i> Feldman & Kislev ex K. Hammer               | Southern Israel            | Wild          | SS                    |
| 2n            | B01        | <i>Hordeum vulgare</i> L. subsp. vulgare                            | Seine-et-Marne France      | Cultivated    | Outgroup              |
| 2n            | B03        | <i>Hordeum vulgare</i> L. subsp. spontaneum (K. Koch) Thell.        | Central Israel             | Wild          | Outgroup              |
| 4n            | C01        | <i>Gossypium hirsutum</i> L.                                        | Mississippi United States  | Cultivated    | Outgroup              |
| 4n            | C02        | <i>Gossypium hirsutum</i> L.                                        | Oaxaca Mexico              | Wild          | Outgroup              |
| 2n            | C03        | <i>Gossypium arboreum</i> L.                                        | India                      | Wild          | Outgroup              |
| 2n            | W02        | <i>Triticum monococcum</i> L. subsp. monococcum                     | Thuringia Germany          | Cultivated    | AmAm                  |
| 2n            | W23        | <i>Triticum monococcum</i> L. subsp. aegilopoides (Link) Thell.     | England United Kingdom     | Wild          | AmAm                  |
| 4n            | W40        | <i>Triticum turgidum</i> L. subsp. durum (Desf.) Husn.              | Cape Province South Africa | Cultivated    | AABB                  |
| 4n            | W11        | <i>Triticum turgidum</i> L. subsp. paleocolchicum A. Love & D. Love | England United Kingdom     | Wild          | AABB                  |
| 6n            | W36        | <i>Triticum aestivum</i> L. subsp. aestivum                         | Brazil                     | Cultivated    | AABBDD                |
| 6n            | ENT7       | GAN/AE.SQUARROSA (180)                                              | CIMMYT                     | Synthetic     | AABBDD                |
| 6n            | W17        | <i>Triticum aestivum</i> L. subsp macha Dekapr & Menabde Mackey     | Switzerland                | Wild          | AABBDD                |

**S2 Table.**

Genetic and source information on lines used for 2017 field study. ‘CIMMYT’ denotes the International Maize and Wheat Improvement Center. ‘SID’ denotes species ID

| Ploidy | SID  | Taxonomy                                                                        | Origin                     | Status        | Genome Lineage |
|--------|------|---------------------------------------------------------------------------------|----------------------------|---------------|----------------|
| 2n     | A02  | <i>Aegilops tauschii</i> Coss.                                                  | Xinjiang China             | Wild material | DD             |
| 2n     | A03  | <i>Aegilops searsii</i> Feldman & Kislev ex K. Hammer                           | Jordan                     | Wild material | SS             |
| 2n     | A04  | <i>Aegilops searsii</i> Feldman & Kislev ex K. Hammer                           | Southern Israel            | Wild material | SS             |
| 2n     | A05  | <i>Aegilops tauschii</i> Coss.                                                  | Azerbaijan                 | Wild material | DD             |
| 2n     | B01  | <i>Hordeum vulgare</i> L. subsp. vulgare                                        | Seine-et-Marne France      | Cultivated    | Outgroup       |
| 2n     | B02  | <i>Hordeum vulgare</i> L. subsp. vulgare                                        | Arkansas United States     | Cultivated    | Outgroup       |
| 2n     | B03  | <i>Hordeum vulgare</i> L. subsp. spontaneum (K. Koch) Thell.                    | Central Israel             | Wild material | Outgroup       |
| 4n     | C01  | <i>Gossypium hirsutum</i> L.                                                    | Mississippi United States  | Cultivated    | Outgroup       |
| 4n     | C02  | <i>Gossypium hirsutum</i> L.                                                    | Oaxaca Mexico              | Wild material | Outgroup       |
| 2n     | C03  | <i>Gossypium arboreum</i> L.                                                    | India                      | Wild material | Outgroup       |
| 2n     | C04  | <i>Gossypium raimondii</i> Ulbr.                                                | Cajamarca Peru             | Wild material | Outgroup       |
| 6n     | ENT7 | GAN/AE.SQUARROSA (180)                                                          | CIMMYT                     | Synthetic     | AABBDD         |
| 6n     | ENT8 | CROC_1/AE.SQUARROSA (507)                                                       | CIMMYT                     | Synthetic     | AABBDD         |
| 4n     | W01  | <i>Triticum turgidum</i> L. subsp. dicoccon (Schrank) Thell.                    | Madhya Pradesh India       | Cultivated    | AABB           |
| 2n     | W02  | <i>Triticum monococcum</i> L. subsp. monococcum                                 | Thuringia Germany          | Cultivated    | AmAm           |
| 6n     | W04  | <i>Triticum aestivum</i> L. subsp. macha (Dekapr. & Menabde) Mackey             | Mazandaran Iran            | Wild material | AABBDD         |
| 4n     | W11  | <i>Triticum turgidum</i> L. subsp. paleocolchicum A. Love & D. Love             | England United Kingdom     | Wild material | AABB           |
| 4n     | W19  | <i>Triticum turgidum</i> L. subsp. dicocoides (Korn. ex Asch. & Graebn.) Thell. | Cluj Romania               | Wild material | AABB           |
| 2n     | W21  | <i>Triticum monococcum</i> L. subsp. monococcum                                 | Georgia                    | Landrace      | AmAm           |
| 2n     | W23  | <i>Triticum monococcum</i> L. subsp. aegilopoides (Link) Thell.                 | England United Kingdom     | Wild material | AmAm           |
| 2n     | W24  | <i>Triticum monococcum</i> L. subsp. aegilopoides (Link) Thell.                 | Naxcivan Azerbaijan        | Wild material | AmAm           |
| 6n     | W25  | <i>Triticum aestivum</i> L. subsp. macha (Dekapr. & Menabde) Mackey             | Latium Italy               | Wild material | AABBDD         |
| 2n     | W26  | <i>Triticum urartu</i> Tumanian ex Gandilyan                                    | Mardin Turkey              | Wild material | AA             |
| 2n     | W27  | <i>Triticum urartu</i> Tumanian ex Gandilyan                                    | El Beqaa Lebanon           | Wild material | AA             |
| 4n     | W40  | <i>Triticum turgidum</i> L. subsp. durum (Desf.) Husn.                          | Cape Province South Africa | Cultivated    | AABB           |
| 6n     | W41  | <i>Triticum aestivum</i> L. subsp. aestivum                                     | Free State South Africa    | Cultivated    | AABBDD         |
| 6n     | W45  | <i>Triticum aestivum</i> L. subsp. aestivum                                     | Delhi India                | Cultivated    | AABBDD         |

### S3 Table.

Ploidy is a statistically significant factor in explaining alpha diversity variation in wheat bacterial communities. Analysis of variance results for Shannon Diversity for all data, as well as subsets by sample type, for the bacterial communities sampled from wheat during the 2015 field study. Abbreviations are as follows: 'Df' for degrees of freedom in the factor, 'Sum Sqs' for the sum of squares due to the factor, 'Mean Sqs' for the mean sum of squares due to the factor, and 'F value' for the F-statistic. A p-value less than 0.001 is denoted by '\*\*\*', less than 0.01 '\*\*', less than 0.05 '\*', and less than 0.10 '.'.

| Shannon     | Factor                      | Df | Sums Sqs | Mean Sqs | F value | P value  |     |
|-------------|-----------------------------|----|----------|----------|---------|----------|-----|
| All data    | SampleType                  | 2  | 15.84    | 7.92     | 91.474  | <2e-16   | *** |
|             | Ploidy                      | 2  | 0.77     | 0.385    | 4.444   | 0.0175   | *   |
|             | TimePoint                   | 1  | 0.019    | 0.019    | 0.224   | 0.6381   |     |
|             | Block                       | 1  | 0.097    | 0.097    | 1.118   | 0.2961   |     |
|             | SampleType:Ploidy           | 4  | 0.665    | 0.166    | 1.919   | 0.1241   |     |
|             | SampleType:TimePoint        | 2  | 0.507    | 0.253    | 2.927   | 0.064    | .   |
|             | Ploidy:TimePoint            | 2  | 0.086    | 0.043    | 0.499   | 0.6103   |     |
|             | SampleType:Ploidy:TimePoint | 4  | 0.342    | 0.085    | 0.987   | 0.4246   |     |
|             | Residuals                   | 44 | 3.81     | 0.087    |         |          |     |
| Root        | Ploidy                      | 2  | 0.604    | 0.302    | 1.441   | 0.266    |     |
|             | TimePoint                   | 1  | 0.266    | 0.26556  | 1.267   | 0.277    |     |
|             | Block                       | 1  | 0.164    | 0.16376  | 0.782   | 0.39     |     |
|             | Ploidy:TimePoint            | 2  | 0.16     | 0.08018  | 0.383   | 0.688    |     |
|             | Residuals                   | 16 | 3.353    | 0.20954  |         |          |     |
| Rhizosphere | Ploidy                      | 2  | 0.53     | 0.265    | 23.567  | 1.25E-05 | *** |
|             | TimePoint                   | 1  | 0.0111   | 0.01108  | 0.985   | 0.335    |     |
|             | Block                       | 1  | 0.0187   | 0.01867  | 1.661   | 0.215    |     |
|             | Ploidy:TimePoint            | 2  | 0.0374   | 0.0187   | 1.663   | 0.219    |     |
|             | Residuals                   | 17 | 0.1912   | 0.01124  |         |          |     |
| Soil        | Ploidy                      | 2  | 0.29533  | 0.14767  | 7.645   | 0.01147  | *   |
|             | TimePoint                   | 1  | 0.21805  | 0.21805  | 11.29   | 0.00839  | **  |
|             | Block                       | 1  | 0.00457  | 0.00457  | 0.237   | 0.63835  |     |
|             | Ploidy:TimePoint            | 2  | 0.26916  | 0.13458  | 6.968   | 0.01485  | *   |
|             | Residuals                   | 9  | 0.17383  | 0.01931  |         |          |     |

#### S4 Table.

Ploidy is a statistically significant factor in explaining beta diversity variation in wheat bacterial communities. Analysis of variance results for Bray-Curtis dissimilarity for all data, as well as subsets by sample type, for the bacterial communities sampled from wheat during the 2015 field study. Abbreviations are as follows: 'Df' for degrees of freedom in the factor, 'Sum Sqs' for the sum of squares due to the factor, 'Mean Sqs' for the mean sum of squares due to the factor, and 'F value' for the F-statistic. A p-value less than 0.001 is denoted by '\*\*\*', less than 0.01 '\*\*', less than 0.05 '\*', and less than 0.10 '.'.

| Bray        | Factor                      | Df | Sums Sqs | Mean Sqs | F value | R2      | P value |     |
|-------------|-----------------------------|----|----------|----------|---------|---------|---------|-----|
| All data    | SampleType                  | 2  | 4.6849   | 2.34246  | 22.1991 | 0.37153 | 0.001   | *** |
|             | Ploidy                      | 2  | 0.5735   | 0.28676  | 2.7176  | 0.04548 | 0.004   | **  |
|             | TimePoint                   | 1  | 0.7303   | 0.73031  | 6.9211  | 0.05792 | 0.001   | *** |
|             | Block                       | 1  | 0.3142   | 0.31419  | 2.9775  | 0.02492 | 0.005   | **  |
|             | SampleType:Ploidy           | 4  | 0.5622   | 0.14054  | 1.3319  | 0.04458 | 0.134   |     |
|             | SampleType:TimePoint        | 2  | 0.4539   | 0.22697  | 2.1509  | 0.036   | 0.015   | *   |
|             | Ploidy:TimePoint            | 2  | 0.2863   | 0.14317  | 1.3568  | 0.02271 | 0.147   |     |
|             | SampleType:Ploidy:TimePoint | 4  | 0.3616   | 0.0904   | 0.8567  | 0.02868 | 0.665   |     |
|             | Residuals                   | 44 | 4.6429   | 0.10552  |         | 0.36819 |         |     |
|             | Total                       | 62 | 12.6099  |          |         | 1       |         |     |
| Root        | Ploidy                      | 2  | 0.555    | 0.2775   | 2.503   | 0.16095 | 0.001   | *** |
|             | TimePoint                   | 1  | 0.653    | 0.65296  | 5.8896  | 0.18936 | 0.001   | *** |
|             | Block                       | 1  | 0.2137   | 0.21365  | 1.9271  | 0.06196 | 0.016   | *   |
|             | Ploidy:TimePoint            | 2  | 0.2527   | 0.12635  | 1.1397  | 0.07329 | 0.273   |     |
|             | Residuals                   | 16 | 1.7739   | 0.11087  |         | 0.51444 |         |     |
|             | Total                       | 22 | 3.4482   |          |         | 1       |         |     |
| Rhizosphere | Ploidy                      | 2  | 0.39328  | 0.19664  | 2.2714  | 0.15556 | 0.001   | *** |
|             | TimePoint                   | 1  | 0.31712  | 0.31712  | 3.663   | 0.12543 | 0.001   | *** |
|             | Block                       | 1  | 0.14834  | 0.14834  | 1.7135  | 0.05867 | 0.022   | *   |
|             | Ploidy:TimePoint            | 2  | 0.19775  | 0.09887  | 1.1421  | 0.07822 | 0.225   |     |
|             | Residuals                   | 17 | 1.47174  | 0.08657  |         | 0.58212 |         |     |
|             | Total                       | 23 | 2.52824  |          |         | 1       |         |     |
| Soil        | Ploidy                      | 2  | 0.18318  | 0.091589 | 0.72313 | 0.09605 | 0.911   |     |
|             | TimePoint                   | 1  | 0.21564  | 0.215644 | 1.70259 | 0.11307 | 0.055   | .   |
|             | Block                       | 1  | 0.21281  | 0.212812 | 1.68023 | 0.11158 | 0.036   | *   |
|             | Ploidy:TimePoint            | 2  | 0.15565  | 0.077824 | 0.61445 | 0.08161 | 0.985   |     |
|             | Residuals                   | 9  | 1.13991  | 0.126657 |         | 0.59769 |         |     |
|             | Total                       | 15 | 1.90719  |          |         | 1       |         |     |

**S5 Table.**

Host factors of ploidy level and domestication status are statistically insignificant in explaining the diversity of wheat bacterial communities. Analysis of variance results from greenhouse study data of the Shannon Diversity (a) and Bray-Curtis dissimilarity (b) of wheat bacterial microbiomes. Abbreviations are as follows: ‘Df’ for degrees of freedom in the factor, ‘SumOfSqs’ for the sum of squares due to the factor, ‘Mean Sqs’ for the mean sum of squares due to the factor, and ‘F value’ for the F-statistic. A p-value less than 0.001 is denoted by ‘\*\*\*’, less than 0.01 ‘\*\*’, less than 0.05 ‘\*’, and less than 0.10 ‘.’.

| a)                          | Analysis | Factor                           | Df        | SumsOfSqs | Mean Sqs | F value | P value |    |
|-----------------------------|----------|----------------------------------|-----------|-----------|----------|---------|---------|----|
| All data                    |          | Sample_Type                      | 2         | 6.7       | 3.348    | 6.896   | 0.00144 | ** |
|                             |          | GenomeLineage                    | 5         | 3.45      | 0.69     | 1.421   | 0.22124 |    |
|                             |          | Status                           | 2         | 0.26      | 0.13     | 0.267   | 0.76585 |    |
|                             |          | Ploidy                           | 1         | 0.18      | 0.18     | 0.37    | 0.54408 |    |
|                             |          | Sample_Type:GenomeLineage        | 8         | 5.19      | 0.649    | 1.337   | 0.23119 |    |
|                             |          | Sample_Type:Status               | 4         | 1.4       | 0.35     | 0.72    | 0.57963 |    |
|                             |          | GenomeLineage:Status             | 3         | 0.11      | 0.036    | 0.075   | 0.97358 |    |
|                             |          | Sample_Type:Ploidy               | 2         | 2.78      | 1.39     | 2.864   | 0.0608  | .  |
|                             |          | Status:Ploidy                    | 1         | 0.23      | 0.227    | 0.468   | 0.4952  |    |
|                             |          | Sample_Type:GenomeLineage:Status | 6         | 1.84      | 0.306    | 0.631   | 0.70546 |    |
|                             |          | Sample_Type:Status:Ploidy        | 2         | 0.75      | 0.377    | 0.776   | 0.46242 |    |
|                             |          |                                  | Residuals | 125       | 60.69    | 0.486   |         |    |
| Genome Lineage, Soil        |          | GenomeLineage                    | 4         | 2.51      | 0.6279   | 1.435   | 0.228   |    |
|                             |          | Status                           | 1         | 0.34      | 0.3436   | 0.785   | 0.378   |    |
|                             |          | GenomeLineage:Status             | 3         | 0.11      | 0.0353   | 0.081   | 0.97    |    |
|                             |          | Residuals                        | 96        | 42        | 0.4375   |         |         |    |
| Genome Lineage, Rhizosphere |          | GenomeLineage                    | 4         | 5.173     | 1.2933   | 1.556   | 0.231   |    |
|                             |          | Status                           | 1         | 1.4       | 1.4      | 1.685   | 0.212   |    |
|                             |          | GenomeLineage:Status             | 3         | 0.478     | 0.1593   | 0.192   | 0.901   |    |
|                             |          | Residuals                        | 17        | 14.128    | 0.8311   |         |         |    |
| Genome Lineage, Root        |          | GenomeLineage                    | 4         | 1.573     | 0.3933   | 0.79    | 0.545   |    |
|                             |          | Status                           | 1         | 0.002     | 0.0019   | 0.004   | 0.951   |    |
|                             |          | GenomeLineage:Status             | 3         | 1.402     | 0.4672   | 0.939   | 0.44    |    |
|                             |          | Residuals                        | 20        | 9.953     | 0.4976   |         |         |    |
| Ploidy, Soil                |          | Ploidy                           | 2         | 0.0769    | 0.03845  | 1.524   | 0.245   |    |
|                             |          | Status                           | 1         | 0.0077    | 0.00765  | 0.303   | 0.589   |    |
|                             |          | Ploidy:Status                    | 2         | 0.0681    | 0.03403  | 1.349   | 0.284   |    |
|                             |          | Residuals                        | 18        | 0.4541    | 0.02523  |         |         |    |
| Ploidy, Rhizosphere         |          | Ploidy                           | 2         | 3.843     | 1.9213   | 1.272   | 0.346   |    |
|                             |          | Status                           | 1         | 0.949     | 0.949    | 0.628   | 0.458   |    |
|                             |          | Ploidy:Status                    | 2         | 0.438     | 0.2192   | 0.145   | 0.868   |    |
|                             |          | Residuals                        | 6         | 9.065     | 1.5109   |         |         |    |
| Ploidy, Root                |          | Ploidy                           | 2         | 1.457     | 0.7286   | 0.812   | 0.474   |    |
|                             |          | Status                           | 1         | 0.017     | 0.0165   | 0.018   | 0.895   |    |
|                             |          | Ploidy:Status                    | 2         | 1.381     | 0.6904   | 0.769   | 0.492   |    |
|                             |          | Residuals                        | 9         | 8.077     | 0.8975   |         |         |    |

**S5 Table (continued).**

| Analysis                          | Factor               | Df | SumsOfSqs | Mean Sqs | F value | P value |  |
|-----------------------------------|----------------------|----|-----------|----------|---------|---------|--|
| Domestication Status, Soil        | GenomeLineage        | 4  | 0.3611    | 0.09028  | 1.605   | 0.191   |  |
|                                   | Status               | 1  | 0.0396    | 0.03964  | 0.705   | 0.406   |  |
|                                   | GenomeLineage:Status | 3  | 0.0764    | 0.02545  | 0.452   | 0.717   |  |
|                                   | Residuals            | 41 | 2.3063    | 0.05625  |         |         |  |
| Domestication Status, Rhizosphere | GenomeLineage        | 4  | 5.173     | 1.2933   | 1.556   | 0.231   |  |
|                                   | Status               | 1  | 1.4       | 1.4      | 1.685   | 0.212   |  |
|                                   | GenomeLineage:Status | 3  | 0.478     | 0.1593   | 0.192   | 0.901   |  |
|                                   | Residuals            | 17 | 14.128    | 0.8311   |         |         |  |
| Domestication Status, Root        | GenomeLineage        | 4  | 1.573     | 0.3933   | 0.79    | 0.545   |  |
|                                   | Status               | 1  | 0.002     | 0.0019   | 0.004   | 0.951   |  |
|                                   | GenomeLineage:Status | 3  | 1.402     | 0.4672   | 0.939   | 0.44    |  |
|                                   | Residuals            | 20 | 9.953     | 0.4976   |         |         |  |

b)

| Analysis                    | Factor                           | Df  | SumsOfSqs | Mean Sqs | F value | R2      | P value |     |
|-----------------------------|----------------------------------|-----|-----------|----------|---------|---------|---------|-----|
| All data                    | Sample_Type                      | 2   | 5.9936    | 2.99679  | 20.0987 | 0.19126 | 0.001   | *** |
|                             | GenomeLineage                    | 5   | 3.4966    | 0.69931  | 4.6901  | 0.11158 | 0.001   | *** |
|                             | Status                           | 2   | 0.1417    | 0.07087  | 0.4753  | 0.00452 | 0.986   |     |
|                             | Sample_Type:GenomeLineage        | 8   | 1.1922    | 0.14903  | 0.9995  | 0.03805 | 0.498   |     |
|                             | Sample_Type:Status               | 4   | 0.2354    | 0.05885  | 0.3947  | 0.00751 | 1       |     |
|                             | GenomeLineage:Status             | 3   | 0.3179    | 0.10597  | 0.7107  | 0.01015 | 0.852   |     |
|                             | Sample_Type:GenomeLineage:Status | 6   | 0.4267    | 0.07112  | 0.477   | 0.01362 | 1       |     |
|                             | Residuals                        | 131 | 19.5326   | 0.1491   |         | 0.62331 |         |     |
|                             | Total                            | 161 | 31.3367   |          |         | 1       |         |     |
| Genome Lineage, Soil        | GenomeLineage                    | 1   | 0.17941   | 0.179409 | 2.2601  | 0.17603 | 0.008   | **  |
|                             | Status                           | 1   | 0.046     | 0.046001 | 0.5795  | 0.04513 | 0.94    |     |
|                             | Residuals                        | 10  | 0.7938    | 0.07938  |         | 0.77884 |         |     |
|                             | Total                            | 12  | 1.01921   |          |         | 1       |         |     |
| Genome Lineage, Rhizosphere | GenomeLineage                    | 1   | 0.19184   | 0.19184  | 1.58905 | 0.37513 | 0.2     |     |
|                             | Status                           | 1   | 0.07811   | 0.078106 | 0.64697 | 0.15273 | 0.6667  |     |
|                             | Residuals                        | 2   | 0.24145   | 0.120726 |         | 0.47214 |         |     |
|                             | Total                            | 4   | 0.5114    |          |         | 1       |         |     |
| Genome Lineage, Root        | GenomeLineage                    | 1   | 0.13722   | 0.137223 | 1.53625 | 0.29798 | 0.1556  |     |
|                             | Status                           | 1   | 0.05531   | 0.055313 | 0.61925 | 0.12011 | 0.8667  |     |
|                             | Residuals                        | 3   | 0.26797   | 0.089323 |         | 0.5819  |         |     |
|                             | Total                            | 5   | 0.46051   |          |         | 1       |         |     |
| Ploidy, Soil                | Ploidy                           | 2   | 0.14678   | 0.073388 | 1.05872 | 0.09074 | 0.359   |     |
|                             | Status                           | 1   | 0.048     | 0.047998 | 0.69243 | 0.02967 | 0.778   |     |
|                             | Ploidy:Status                    | 2   | 0.17507   | 0.087533 | 1.26278 | 0.10823 | 0.183   |     |
|                             | Residuals                        | 18  | 1.24772   | 0.069318 |         | 0.77136 |         |     |
|                             | Total                            | 23  | 1.61756   |          |         | 1       |         |     |

**S5 Table (continued).**

| Analysis                          | Factor        | Df | SumsOfSqs | Mean Sqs | F value | R2      | P value |   |
|-----------------------------------|---------------|----|-----------|----------|---------|---------|---------|---|
| Ploidy, Rhizosphere               | Ploidy        | 2  | 0.33147   | 0.165737 | 1.31234 | 0.23758 | 0.25    |   |
|                                   | Status        | 1  | 0.12984   | 0.129841 | 1.0281  | 0.09306 | 0.339   |   |
|                                   | Ploidy:Status | 2  | 0.17616   | 0.088079 | 0.69743 | 0.12626 | 0.649   |   |
|                                   | Residuals     | 6  | 0.75775   | 0.126292 |         | 0.5431  |         |   |
|                                   | Total         | 11 | 1.39522   |          |         | 1       |         |   |
| Ploidy, Root                      | Ploidy        | 2  | 0.19499   | 0.097497 | 1.00529 | 0.14731 | 0.39    |   |
|                                   | Status        | 1  | 0.0433    | 0.043302 | 0.44648 | 0.03271 | 0.832   |   |
|                                   | Ploidy:Status | 2  | 0.21258   | 0.106289 | 1.09595 | 0.16059 | 0.301   |   |
|                                   | Residuals     | 9  | 0.87285   | 0.096984 |         | 0.65939 |         |   |
|                                   | Total         | 14 | 1.32373   |          |         | 1       |         |   |
| Domestication Status, Soil        | Ploidy        | 2  | 0.1804    | 0.090195 | 1.20728 | 0.04844 | 0.213   |   |
|                                   | Status        | 1  | 0.1105    | 0.110468 | 1.47864 | 0.02967 | 0.123   |   |
|                                   | Ploidy:Status | 2  | 0.1456    | 0.072823 | 0.97475 | 0.03911 | 0.461   |   |
|                                   | Residuals     | 44 | 3.2872    | 0.074709 |         | 0.88278 |         |   |
|                                   | Total         | 49 | 3.7237    |          |         | 1       |         |   |
| Domestication Status, Rhizosphere | Ploidy        | 2  | 0.2305    | 0.11523  | 0.92081 | 0.072   | 0.477   |   |
|                                   | Status        | 1  | 0.2304    | 0.23042  | 1.84132 | 0.07198 | 0.117   |   |
|                                   | Ploidy:Status | 2  | 0.2373    | 0.11867  | 0.94833 | 0.07415 | 0.465   |   |
|                                   | Residuals     | 20 | 2.5027    | 0.12514  |         | 0.78187 |         |   |
|                                   | Total         | 25 | 3.2009    |          |         | 1       |         |   |
| Domestication Status, Root        | Ploidy        | 2  | 0.5997    | 0.299829 | 2.28263 | 0.15348 | 0.025   | * |
|                                   | Status        | 1  | 0.0413    | 0.041278 | 0.31426 | 0.01057 | 0.985   |   |
|                                   | Ploidy:Status | 2  | 0.245     | 0.122511 | 0.93269 | 0.06271 | 0.482   |   |
|                                   | Residuals     | 23 | 3.0211    | 0.131352 |         | 0.77324 |         |   |
|                                   | Total         | 28 | 3.9071    |          |         | 1       |         |   |



**S6 Table.**

Ploidy and domestication status minimally explain variation in bacterial alpha and beta diversity. Analysis of variance (ANOVA) results from 2017 field experiment rhizosphere bacterial microbiome data of a) Shannon Diversity and b) Bray-Curtis dissimilarity.

Abbreviations are as follows: 'Df' for degrees of freedom in the factor, 'Sum Sqs' for the sum of squares due to the factor, 'Mean Sqs' for the mean sum of squares due to the factor, and 'F value' for the F-statistic. A p-value less than 0.001 is denoted by '\*\*\*', less than 0.01 '\*\*', less than 0.05 '\*', and less than 0.10 '!'.

a)

| Analysis             | Factor                     | Df | Sums Sqs | Mean Sqs | F value | P value |   |
|----------------------|----------------------------|----|----------|----------|---------|---------|---|
| Genome Lineage       | GenomeLineage              | 2  | 0.0416   | 0.02078  | 0.293   | 0.7486  |   |
|                      | Status                     | 2  | 0.29     | 0.145    | 2.042   | 0.1487  |   |
|                      | Block                      | 1  | 0.0814   | 0.0814   | 1.146   | 0.2935  |   |
|                      | GenomeLineage:Block        | 2  | 0.167    | 0.08349  | 1.175   | 0.3235  |   |
|                      | Status:Block               | 2  | 0.3757   | 0.18786  | 2.645   | 0.0887  | . |
|                      | Residuals                  | 28 | 1.9888   | 0.07103  |         |         |   |
| Ploidy               | Ploidy                     | 2  | 0.0819   | 0.041    | 0.566   | 0.5727  |   |
|                      | Status                     | 1  | 0.0255   | 0.0255   | 0.353   | 0.5563  |   |
|                      | Block                      | 1  | 0.2851   | 0.2851   | 3.939   | 0.0549  | . |
|                      | Ploidy:Status              | 2  | 0.4531   | 0.2265   | 3.13    | 0.0558  | . |
|                      | Ploidy:Block               | 2  | 0.0238   | 0.0119   | 0.164   | 0.8491  |   |
|                      | Status:Block               | 1  | 0.0161   | 0.0161   | 0.222   | 0.6401  |   |
|                      | Ploidy:Status:Block        | 2  | 0.6679   | 0.3339   | 4.613   | 0.0165  | * |
|                      | Residuals                  | 36 | 2.606    | 0.0724   |         |         |   |
| Domestication Status | GenomeLineage              | 5  | 0.644    | 0.1289   | 0.99    | 0.4316  |   |
|                      | Status                     | 1  | 0.059    | 0.0591   | 0.454   | 0.503   |   |
|                      | Block                      | 1  | 0.224    | 0.2238   | 1.72    | 0.1949  |   |
|                      | GenomeLineage:Status       | 3  | 1.07     | 0.3566   | 2.74    | 0.0514  | . |
|                      | GenomeLineage:Block        | 5  | 0.167    | 0.0334   | 0.256   | 0.9349  |   |
|                      | Status:Block               | 1  | 0.009    | 0.0088   | 0.068   | 0.7953  |   |
|                      | GenomeLineage:Status:Block | 3  | 0.676    | 0.2255   | 1.732   | 0.1704  |   |
|                      | Residuals                  | 58 | 7.549    | 0.1301   |         |         |   |

**S6 Table (continued).**

b)

| Analysis             | Factor                     | Df     | Sums Sqs | Mean Sqs | F value  | R2      | P value |       |
|----------------------|----------------------------|--------|----------|----------|----------|---------|---------|-------|
| Genome Lineage       | GenomeLineage              | 2      | 0.14006  | 0.070032 | 1.0327   | 0.05225 | 0.366   |       |
|                      | Status                     | 2      | 0.21657  | 0.108286 | 1.5968   | 0.0808  | 0.032   | *     |
|                      | Block                      | 1      | 0.12929  | 0.129287 | 1.9065   | 0.04823 | 0.009   | **    |
|                      | GenomeLineage:Block        | 2      | 0.14126  | 0.070631 | 1.0416   | 0.0527  | 0.358   |       |
|                      | Status:Block               | 2      | 0.15451  | 0.077256 | 1.1393   | 0.05764 | 0.234   |       |
|                      | Residuals                  | 28     | 1.89875  | 0.067813 |          | 0.70837 |         |       |
|                      | Total                      | 37     | 2.68045  |          |          | 1       |         |       |
|                      | Ploidy                     | Ploidy | 2        | 0.1417   | 0.070865 | 1.07524 | 0.0435  | 0.296 |
| Status               |                            | 1      | 0.0767   | 0.076677 | 1.16342  | 0.02353 | 0.204   |       |
| Block                |                            | 1      | 0.1487   | 0.148742 | 2.25688  | 0.04565 | 0.002   | **    |
| Ploidy:Status        |                            | 2      | 0.1657   | 0.08285  | 1.25709  | 0.05085 | 0.103   |       |
| Ploidy:Block         |                            | 2      | 0.1139   | 0.056974 | 0.86447  | 0.03497 | 0.758   |       |
| Status:Block         |                            | 1      | 0.0712   | 0.071237 | 1.08088  | 0.02186 | 0.297   |       |
| Ploidy:Status:Block  |                            | 2      | 0.1679   | 0.083939 | 1.27361  | 0.05152 | 0.1     | .     |
| Residuals            |                            | 36     | 2.3726   | 0.065906 |          | 0.72813 |         |       |
| Total                |                            | 47     | 3.2585   |          |          | 1       |         |       |
| Domestication Status | GenomeLineage              | 5      | 0.4149   | 0.082974 | 1.12172  | 0.0704  | 0.182   |       |
|                      | Status                     | 1      | 0.1122   | 0.112209 | 1.51694  | 0.01904 | 0.06    | .     |
|                      | Block                      | 1      | 0.2125   | 0.21245  | 2.8721   | 0.03605 | 0.001   | ***   |
|                      | GenomeLineage:Status       | 3      | 0.2482   | 0.082748 | 1.11866  | 0.04213 | 0.212   |       |
|                      | GenomeLineage:Block        | 5      | 0.3286   | 0.065728 | 0.88857  | 0.05577 | 0.773   |       |
|                      | Status:Block               | 1      | 0.0552   | 0.055179 | 0.74596  | 0.00936 | 0.825   |       |
|                      | GenomeLineage:Status:Block | 3      | 0.2311   | 0.077041 | 1.04151  | 0.03922 | 0.376   |       |
|                      | Residuals                  | 58     | 4.2903   | 0.07397  |          | 0.72803 |         |       |
|                      | Total                      | 77     | 5.893    |          |          | 1       |         |       |
